# Supplementary material for: Photodissociation dynamics of methyl iodide probed using femtosecond extreme ultraviolet photoelectron spectroscopy
Source: Royal Society of Chemistry journal article supplement (doi:10.1039/d0cp03478a), 2020-01-01
Supplement: d0cp03478a1.pdf [file d0cp03478a1.pdf]

## Electronic Supplementary Information for: Photodissociation dynamics of methyl iodide probed using femtosecond extreme ultraviolet photoelectron spectroscopy

Emily M. Warne,<sup>a</sup> Briony Downes-Ward,<sup>a</sup> Joanne Woodhouse,<sup>a</sup> Michael A. Parkes,<sup>b</sup> Emma Springate,<sup>c</sup> Philip A. J. Pearcy,<sup>c</sup> Yu Zhang,<sup>c</sup> Gabriel Karras,<sup>c</sup> Adam S. Wyatt,<sup>c</sup> Richard T. Chapman,<sup>c</sup> and Russell S. Minns<sup>a</sup>

<sup>a</sup> School of Chemistry, University of Southampton, Highfield, Southampton SO17 1BJ, UK

<sup>b</sup> Department of Chemistry, University College London, 20 Gordon Street, London. WC1H 0AJ, UK

<sup>c</sup> Central Laser Facility, STFC Rutherford Appleton Laboratory, Didcot, Oxfordshire OX11 0QX, UK

‡ Email: r.s.minns@soton.ac.uk

### Photoelectron Spectra

Time resolved photoelectron spectra used in the analysis presented in the main manuscript. The pump and probe energies used are 4.6 eV (269 nm) and 22.6 eV (54.9 nm).

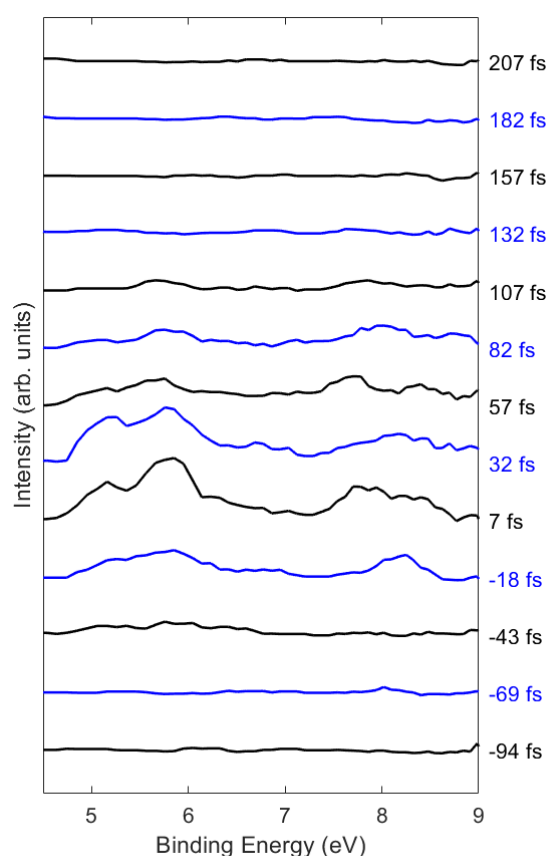

Figure S1: Time resolved photoelectron spectra obtained at a series of pump probe delays. Negative times correspond to the probe arriving first, positive times to the pump arriving first. Each delay is vertically offset to aid presentation.
